# Supplementary material for: Single-cell study links metabolism with nutrient signaling and reveals sources of variability
Source: PubMed Central journal article supplement (PMC5460408; doi:10.1186/s12918-017-0435-z), 2017-06-05
Supplement: 12918_2017_435_MOESM1_ESM.pdf [file 12918_2017_435_MOESM1_ESM.pdf]

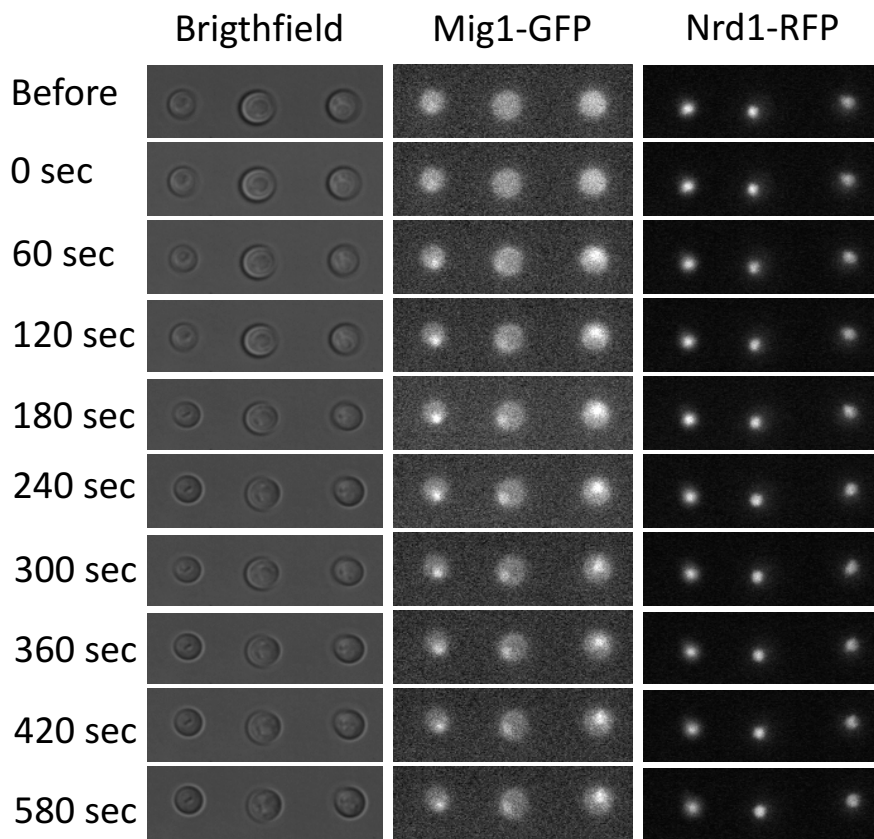

**FigS1.** Sequential images of typical experiment

Sequential images obtained during a microfluidic experiment of WT strain exposed to an upshift from 0 to 220 mM glucose. Brightfield images indicate where the cell membrane is situated, in the green field Mig1-GFP is observed and in the red field images (Nrd1-RFP) the nucleus is localized.
