# Supplementary material for: Single-cell study links metabolism with nutrient signaling and reveals sources of variability
Source: PubMed Central journal article supplement (PMC5460408; doi:10.1186/s12918-017-0435-z), 2017-06-05
Supplement: 12918_2017_435_MOESM2_ESM.pdf [file 12918_2017_435_MOESM2_ESM.pdf]

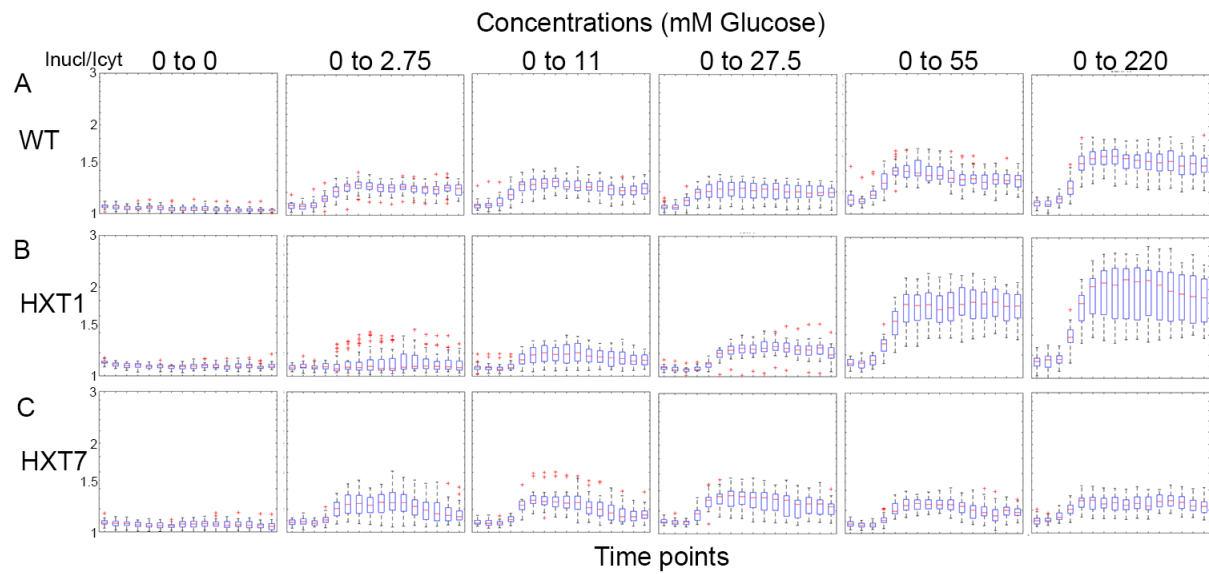

**FigS2.** Boxplot overview of the upshift experiments on all the strains.

These graphs show the spread by a boxplot of the single cells for every time point in the experiment. The bottom and the top of the box represent respectively the 25<sup>th</sup> and of 75<sup>th</sup> percentile and the middle band in the box represent the 50<sup>th</sup> percentile or median. The upper and the lower whisker represent a maximum of 1.5 IQR. The dots represent outliers. Each graph corresponds to one upshift experiments. The different strains are displayed vertically and the different concentrations are displayed horizontally. The wild-type strain displays the lowest spread of the measurements.
