# Supplementary material for: Single-cell study links metabolism with nutrient signaling and reveals sources of variability
Source: PubMed Central journal article supplement (PMC5460408; doi:10.1186/s12918-017-0435-z), 2017-06-05
Supplement: 12918_2017_435_MOESM4_ESM.pdf [file 12918_2017_435_MOESM4_ESM.pdf]

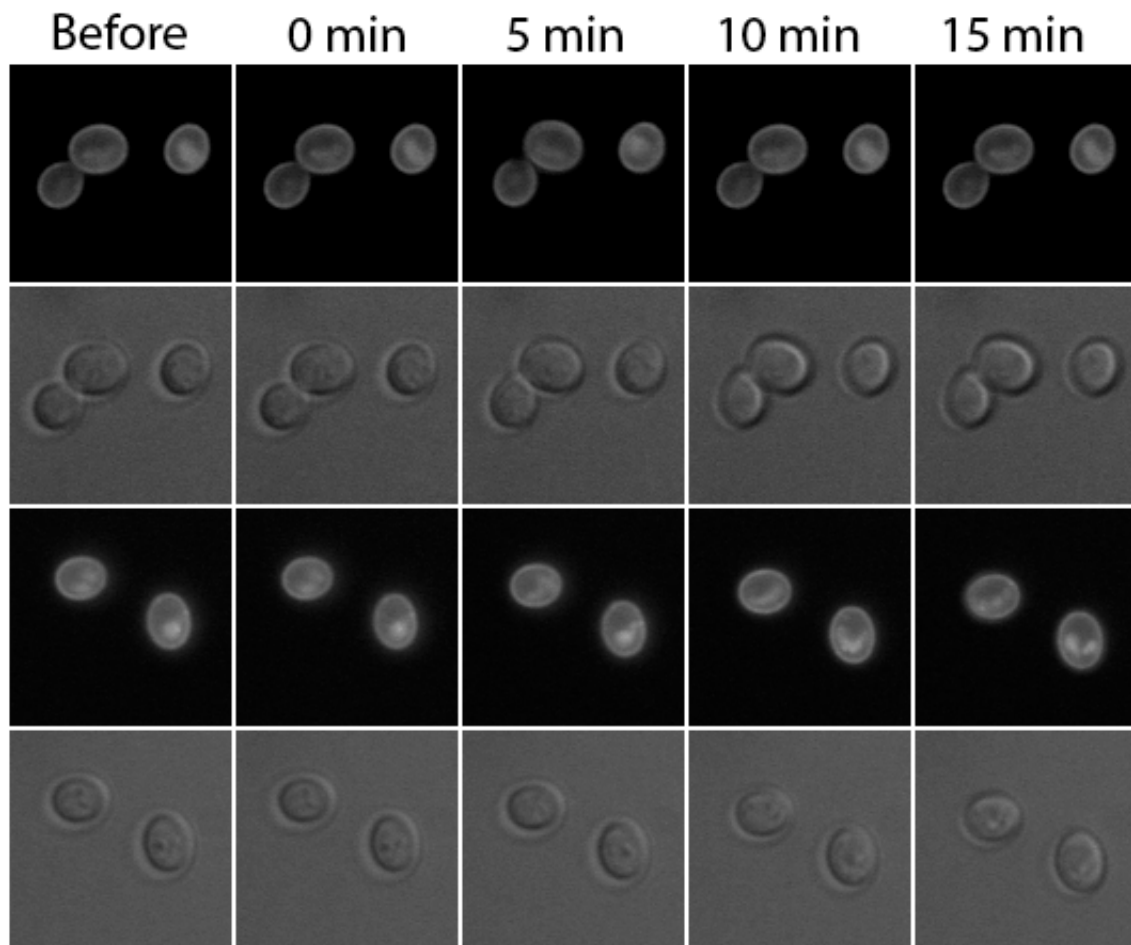

**FigS4.** Study of the cell-to-cell variability observed in the Snf1/Mig1 system.

Hxt7-GFP before and following a switch from ethanol media to media containing 220mM glucose. Time lapse microscopic images, upper images show HXT7-GFP, the lower images show brightfield.
