# Supplementary material for: Single-cell study links metabolism with nutrient signaling and reveals sources of variability
Source: PubMed Central journal article supplement (PMC5460408; doi:10.1186/s12918-017-0435-z), 2017-06-05
Supplement: 12918_2017_435_MOESM8_ESM.pdf [file 12918_2017_435_MOESM8_ESM.pdf]

| Parameter | Perturbation Error, e   | Level of significance |
|-----------|-------------------------|-----------------------|
| Kim2      | $3.51 \cdot 10^{-3}$    | High                  |
| Kex2      | $3.182 \cdot 10^{-3}$   | High                  |
| Vmsa      | $2.6355 \cdot 10^{-7}$  | Middle                |
| Kim1      | $2.5794 \cdot 10^{-7}$  | Middle                |
| Vmg4      | $2.5509 \cdot 10^{-7}$  | Middle                |
| Vmg7      | $2.4821 \cdot 10^{-7}$  | Middle                |
| Vmm       | $2.4738 \cdot 10^{-7}$  | Middle                |
| Vmg1      | $2.4735 \cdot 10^{-7}$  | Middle                |
| Kex1      | $2.4545 \cdot 10^{-7}$  | Middle                |
| Km7       | $2.4539 \cdot 10^{-7}$  | Middle                |
| Ka1       | $2.4465 \cdot 10^{-7}$  | Middle                |
| Ki2       | $2.1965 \cdot 10^{-7}$  | Middle                |
| Km1       | $5.6637 \cdot 10^{-10}$ | Low                   |
| Km4       | $7.4751 \cdot 10^{-12}$ | Low                   |
| Vmsi      | $2.484 \cdot 10^{-13}$  | Low                   |
| Vmd       | $9.5691 \cdot 10^{-14}$ | Low                   |
| Ki1       | $4.9288 \cdot 10^{-14}$ | Low                   |
| Ka2       | $1.0047 \cdot 10^{-15}$ | Low                   |

**Table S1.** The perturbation error

The perturbation error, depicted in the middle column, in response to a perturbation in each parameter, depicted in the left column. Furthermore, the right column contains a classification in terms of the significance of the magnitude of the perturbation error where the three classification levels are high, middle and low. The parameters that have been perturbed are the parameters that were estimated in the wild type data in 220 mM extracellular glucose. Each parameter has been perturbed by a factor  $\exp(s^2)$  where  $s^2 = 0.022$ .
