# Supplementary material for: Single-cell study links metabolism with nutrient signaling and reveals sources of variability
Source: PubMed Central journal article supplement (PMC5460408; doi:10.1186/s12918-017-0435-z), 2017-06-05
Supplement: 12918_2017_435_MOESM9_ESM.pdf [file 12918_2017_435_MOESM9_ESM.pdf]

| <b>Strain name</b> | <b>genotype</b>                                                                                 | <b>construct</b>                                    | <b>source</b>                                                                     |
|--------------------|-------------------------------------------------------------------------------------------------|-----------------------------------------------------|-----------------------------------------------------------------------------------|
| CEN.PK2-1C83       | MATa MAL2-8c<br><br>SUC2                                                                        | <i>Mig1-GFP-KanMx</i><br><i>Nrd1-mCherry-hphNT1</i> | K.D. Entian,<br>Frankfurt am Main,<br>Germany,<br>Fluorescence tag: this<br>study |
| KOY.HXT1P          | KOY.VW100 integration into<br>cassette: <i>HXT7 prom-HXT1-HXT7 term</i><br><i>ura3-52::URA3</i> | <i>Mig1-GFP-KanMx</i><br><i>Nrd1-mCherry-hphNT1</i> | [1], fluorescence<br>tag: this study                                              |
| KOY.HXT7P          | KOY.VW100 integration into<br>cassette: <i>HXT7 prom-HXT7-HXT7 term</i><br><i>ura3-52::URA3</i> | <i>Mig1-GFP-KanMx</i><br><i>Nrd1-mCherry-hphNT1</i> | [1], fluorescence<br>tag: this study                                              |
| KOY.TM6*P          | KOY.VW100 integration into<br>cassette: <i>HXT7 prom-TM6*-HXT7 term</i><br><i>ura3-52::URA3</i> | <i>Mig1-GFP-KanMx</i><br><i>Nrd1-mCherry-hphNT1</i> | [1], fluorescence<br>tag: this study                                              |
| HXT7-GFP           | MATa MAL2-8c<br><br>SUC2 HXT7-GFP::Hix3MX6                                                      | <i>Mig1-GFP-KanMx</i><br><i>Nrd1-mCherry-hphNT1</i> | [2], transfer of<br>construct to new<br>background: this study                    |

**Table S2.** *S. cerevisiae* strains used in this study
