# Supplementary material for: Single-cell study links metabolism with nutrient signaling and reveals sources of variability
Source: PubMed Central journal article supplement (PMC5460408; doi:10.1186/s12918-017-0435-z), 2017-06-05
Supplement: 12918_2017_435_MOESM11_ESM.pdf [file 12918_2017_435_MOESM11_ESM.pdf]

| Parameter | Reaction | Expression for reaction                               | Description of parameter            | Unit                             | Included in Parameter Estimation (Yes/No) |
|-----------|----------|-------------------------------------------------------|-------------------------------------|----------------------------------|-------------------------------------------|
| Kex2      | $r_1$    | $Kex2 \cdot nMig1p$                                   | Export of Mig1p out of the nucleus  | $[s^{-1}]$                       | Yes                                       |
| Vmd       | $r_2$    | $\frac{Vmd \cdot cMig1p}{Ka2 + cMig1p}$               | Dephosphorylation of cytosolic Mig1 | $\left[ \frac{\mu M}{s} \right]$ | Yes                                       |
| Ka2       | $r_2$    | $\frac{Vmd \cdot cMig1p}{Ka2 + cMig1p}$               | Dephosphorylation of cytosolic Mig1 | $[\mu M]$                        | Yes                                       |
| Kim2      | $r_3$    | $Kim2 \cdot cMig1$                                    | Import of Mig1 into the nucleus     | $[s^{-1}]$                       | Yes                                       |
| Vmg1      | $r_{1i}$ | $\frac{Vmg1 \cdot G_{ex}}{Km1 + G_{ex}}$              | Import of Glucose using HXT1        | $\left[ \frac{\mu M}{s} \right]$ | Yes<br>(for HXT1 data)                    |
| Km1       | $r_{1i}$ | $\frac{Vmg1 \cdot G_{ex}}{Km1 + G_{ex}}$              | Import of Glucose using HXT1        | $[\mu M]$                        | Yes<br>(for HXT1 data)                    |
| Vmg4      | $r_{4i}$ | $\frac{Vmg4 \cdot G_{ex}}{Km4 + G_{ex}}$              | Import of Glucose using HXT4        | $\left[ \frac{\mu M}{s} \right]$ | Yes<br>(for HXT4 data)                    |
| Km4       | $r_{4i}$ | $\frac{Vmg4 \cdot G_{ex}}{Km4 + G_{ex}}$              | Import of Glucose using HXT4        | $[\mu M]$                        | Yes<br>(for HXT4 data)                    |
| Vmg7      | $r_{7i}$ | $\frac{Vmg7 \cdot G_{ex}}{Km7 + G_{ex}}$              | Import of Glucose using HXT7        | $\left[ \frac{\mu M}{s} \right]$ | Yes<br>(for HXT7 data)                    |
| Km7       | $r_{7i}$ | $\frac{Vmg7 \cdot G_{ex}}{Km7 + G_{ex}}$              | Import of Glucose using HXT7        | $[\mu M]$                        | Yes<br>(for HXT7 data)                    |
| Vmsi      | $r_5$    | $\frac{Vmsi \cdot cSnf1p \cdot G_{in}}{Ki1 + cSnf1p}$ | Dephosphorylation of cytosolic Snf1 | $[s^{-1}]$                       | Yes                                       |
| Ki1       | $r_5$    | $\frac{Vmsi \cdot cSnf1p \cdot G_{in}}{Ki1 + cSnf1p}$ | Dephosphorylation of                | $[\mu M]$                        | Yes                                       |

|      |          |                                                    |                                                  |                                |     |
|------|----------|----------------------------------------------------|--------------------------------------------------|--------------------------------|-----|
|      |          |                                                    | cytosolic Snf1                                   |                                |     |
| Vmsa | $r_6$    | $\frac{Vmsa \cdot cSnf1}{Ka1 + cSnf1}$             | Phosphorylation of cytosolic Snf1                | $\left[\frac{\mu M}{s}\right]$ | Yes |
| Ka1  | $r_6$    | $\frac{Vmsa \cdot cSnf1}{Ka1 + cSnf1}$             | Phosphorylation of cytosolic Snf1                | $[\mu M]$                      | Yes |
| Kim1 | $r_{7a}$ | $Kim1 \cdot cSnf1p$                                | Import of phosphorylated Snf1 into the nucleus   | $[s^{-1}]$                     | Yes |
| Kex1 | $r_{7b}$ | $Kex1 \cdot nSnf1p$                                | Export of phosphorylated Snf1 out of the nucleus | $[s^{-1}]$                     | Yes |
| Vmm  | $r_8$    | $\frac{Vmm \cdot nMig1 \cdot nSnf1p}{Ki2 + nMig1}$ | Phosphorylation of Mig1 in the nucleus           | $[s^{-1}]$                     | Yes |
| Ki2  | $r_8$    | $\frac{Vmm \cdot nMig1 \cdot nSnf1p}{Ki2 + nMig1}$ | Phosphorylation of Mig1 in the nucleus           | $[\mu M]$                      | Yes |
| Kd   | $r_4$    | $K_d \cdot G_{in}$                                 | Degradation $G_{in}$ through metabolism          | $[s^{-1}]$                     | No  |

**Table S3.** A collection of all parameters in the model.

The parameters are shown in column 1, the reaction in which the parameter occurs is shown in column 2, the expression for the reaction is shown in column 3, the meaning of the parameter is shown in column 4, the unit of the parameter is shown in column 5 and whether or not the parameter is included in the parameter estimation is shown in column 6.
